# Supplementary material
Source: PubMed Central journal article supplement (PMC6196495)
Supplement: pnas.1808945115.sapp.pdf [file pnas.1808945115.sapp.pdf]

## Supplemental methods.

### *Immunoblotting.*

Mitochondrial fractions were isolated using Mitochondria isolation kit for cultured cells (Thermo Fisher Scientific, catalog no. 89874). 30  $\mu$ g of total mitochondrial protein by BCA was separated on 8% SDS-PAGE gel and then transferred to PVDF membrane. Antibodies were used as follows: anti-NDUFV1 (Sigma-Aldrich, SAB2108612), anti-Pyruvate dehydrogenase E1-alpha subunit (Abcam, 110334) and custom anti-NDI1 (kind gift from Dr. Takao Yagi, Scripps Research Institute, La Jolla, CA). Membranes were visualized with IR-fluor labelled secondary antibodies on a LiCor scanner.

**Fig. S1. (a-b)** OCR measure in competition assay between PPV and complex I inhibitors piericidin A (a) and capsaicin (b). Values represent the means  $\pm$  SD. (c) OCR measurement of A549 cells after 5-hour treatment with PPV, atovaquone (ato) and metformin (met). Values represent the means  $\pm$  SD. (d) Drug washout experiment in A549 cells, the % OCR response to 3h of drug treatment (*magenta*) and removal 1 hour (*blue*) and 2 hours (*black*) prior to OCR measurement. 30  $\mu$ M atovaquone and 10  $\mu$ M PPV concentrations were used. Error bars represent standard deviation. (e-f) Trypan blue cell viability assessment (of  $n = 3$ ) of A549 cells treated with 100  $\mu$ M papaverine or 1  $\mu$ M rotenone in normoxia (c) and hypoxia (d) (T = 72 h). Bar charts represent mean of viable cells in duplicates  $\pm$  standard deviation.

**Fig. S2. (a-b)** In vitro radiation survival assessment of A549 cell line treated with 10  $\mu$ M PPV in normoxia (a) and anoxia (b). Normoxic cells were irradiated in triplicates on a cell culture dish, anoxic cells were irradiated in high density suspension after sealing with mineral oil 45 minutes before radiation. Values represent averaged colony counts  $\pm$  standard deviation. (c) Quantification of tumor growth delay in orthotopic EO771 tumors grown in C57Bl6 mice receiving either 5 Gy XRT (*magenta*) or 2 mg/kg PPV 35 minutes prior to 5 Gy XRT (*blue*) ( $n = 3-4$ ). Values are mean tumor volumes  $\pm$  SEM. (d) Quantification of tumor growth delay of heterotopic EO771 flank tumors in nude mice receiving either 5 Gy XRT (*magenta*) or 2 mg/kg PPV 35 minutes after (*blue*) or prior to 5 Gy XRT (*red*) ( $n = 4$ ). Values are mean tumor volumes  $\pm$  SEM. (e-f) Related to Fig 2g tumor growth delay. When tumors reached 4-fold volume increase, groups receiving no treatment or PPV only (e); and XRT only or PPV followed by XRT (f), tumor weights were compared. Values are mean tumor weights  $\pm$  SEM ( $n = 8$ ).  $P$  values were calculated with two-tailed two-sample  $t$  test. (g) Related to Fig 2g tumor growth delay. Representative images of orthotopic EO771 tumors harvested on day 11 after treatment with XRT (top) or 2 mg/kg PPV followed by XRT (bottom). \* $P < 0.05$ ; \*\* $P < 0.01$ ; \*\*\* $P < 0.001$ ; \*\*\*\* $P < 0.0001$ ; n.s., not significant.

**Fig. S3. (a-b)** Uncropped western blot membrane used for figure 3a showing NDUFV1 and PDH E1 $\alpha$  levels (a) before probing for NDI1 (b). (c) Quantification of baseline OCR in parent A549 and NDUFV1 KO  $\pm$  NDI1 cells. Values represent mean OCR from at least 5 replicates  $\pm$  SD. (d) In vitro radiation survival assessment of A549 NDUFV1 KO cells  $\pm$  NDI1 treated with 10  $\mu$ M PPV. Curves represent averaged colony counts  $\pm$  SD. (e) Tumor growth delay of heterotopic NDUFV1 KO NDI1 (different NDUFV1 KO clone) flank xenografts in nude mice after receiving either 8 Gy dose of XRT (*magenta*) or 2 mg per kg body weight PPV 35 minutes prior

to 8 Gy XRT (*blue*) ( $n = 4$ ). Values are mean tumor volumes  $\pm$  SEM.  $P$  values were calculated against XRT with two-tailed two-sample  $t$  test. \* $P < 0.05$ ; \*\* $P < 0.01$ ; \*\*\* $P < 0.001$ ; \*\*\*\* $P < 0.0001$ ; n.s., not significant.

**Fig. S4.** (a) Seahorse OCR data showing no effect of increasing concentrations of phosphodiesterase 5 inhibitor sildenafil citrate (0, 5, 10, 20  $\mu$ M) in Panc1 cell line. Values are means  $\pm$  SD. (b) Seahorse OCR analysis showing no effect of treatment with increasing concentrations of synthetic cAMP analog 8-Bromo-cAMP (0, 10, 20  $\mu$ M) in Panc1 cells. Values are means  $\pm$  SD. (c) Quantification of OCR and PDE10 inhibitory activities of 41 novel PPV derivatives normalized to PPV evaluated by Seahorse (OCR inhibition at 10  $\mu$ M concentration, 1  $\mu$ M for rotenone) and PDE10A enzymatic assay (PDE10A inhibition at 1  $\mu$ M). Bars represent mean OCR and PDE10 inhibitory activities from at least 5 (OCR) or 3 (PDE) replicates. All experiments were repeated at least twice. (d) Competition assay with SMV-32 and rotenone in A549 cells. (e) Cellular toxicity of PPV derivatives in vitro measured by trypan blue after 72 h treatment at 10  $\mu$ M. Values are mean  $\pm$  SEM.

Benej et al Figure S1

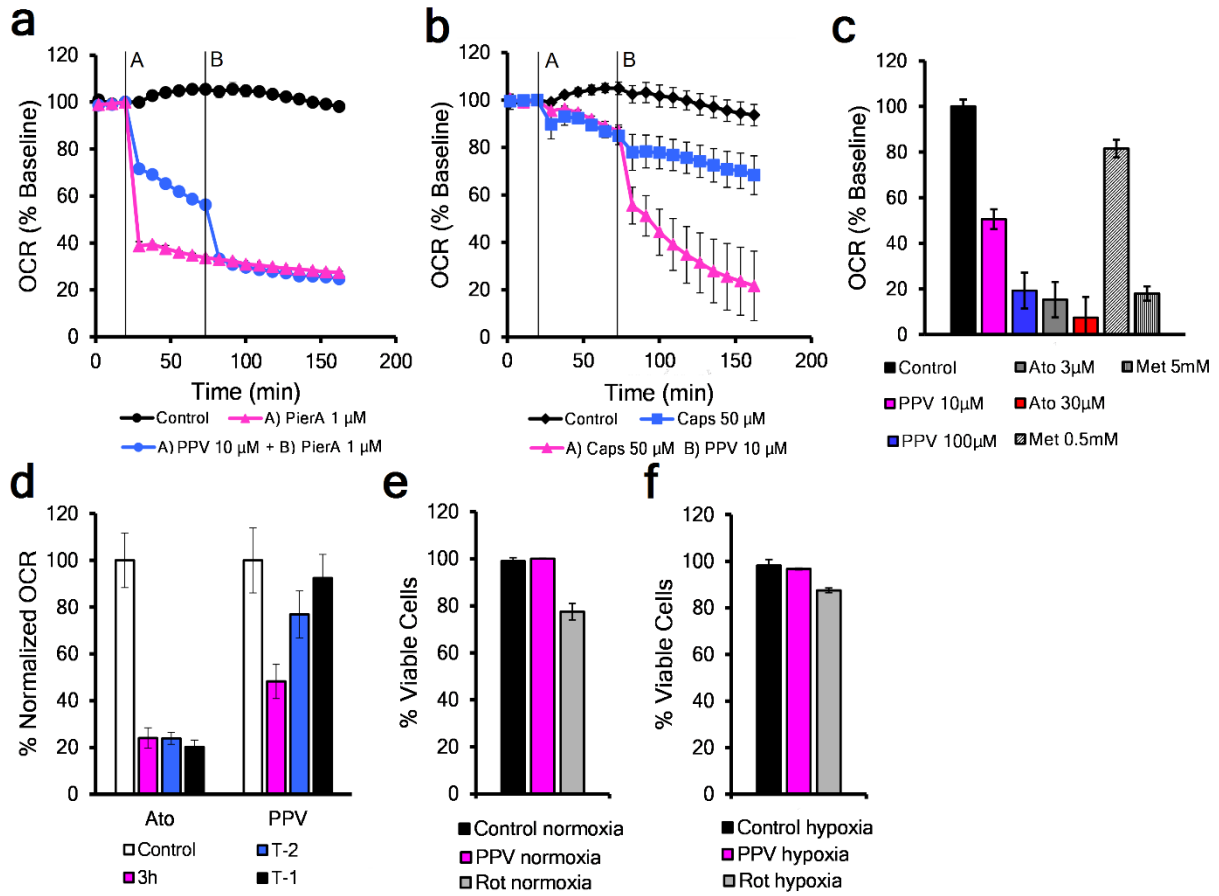

Benej et al Figure S2

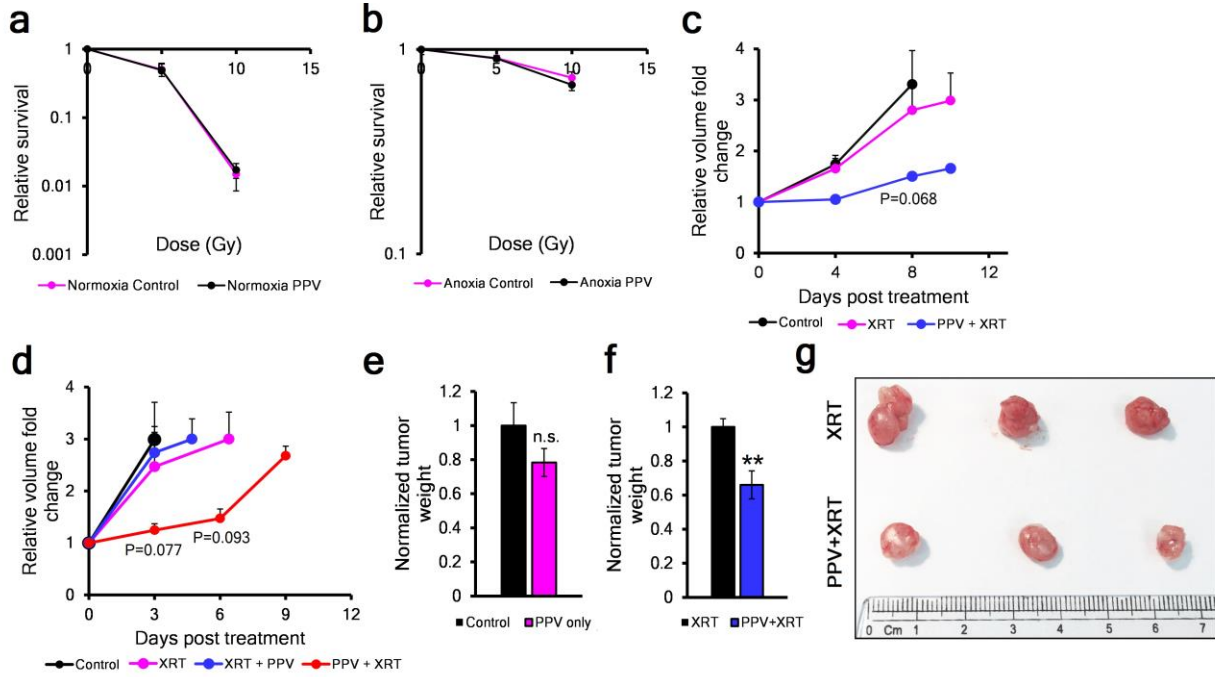

Benej et al Figure S3

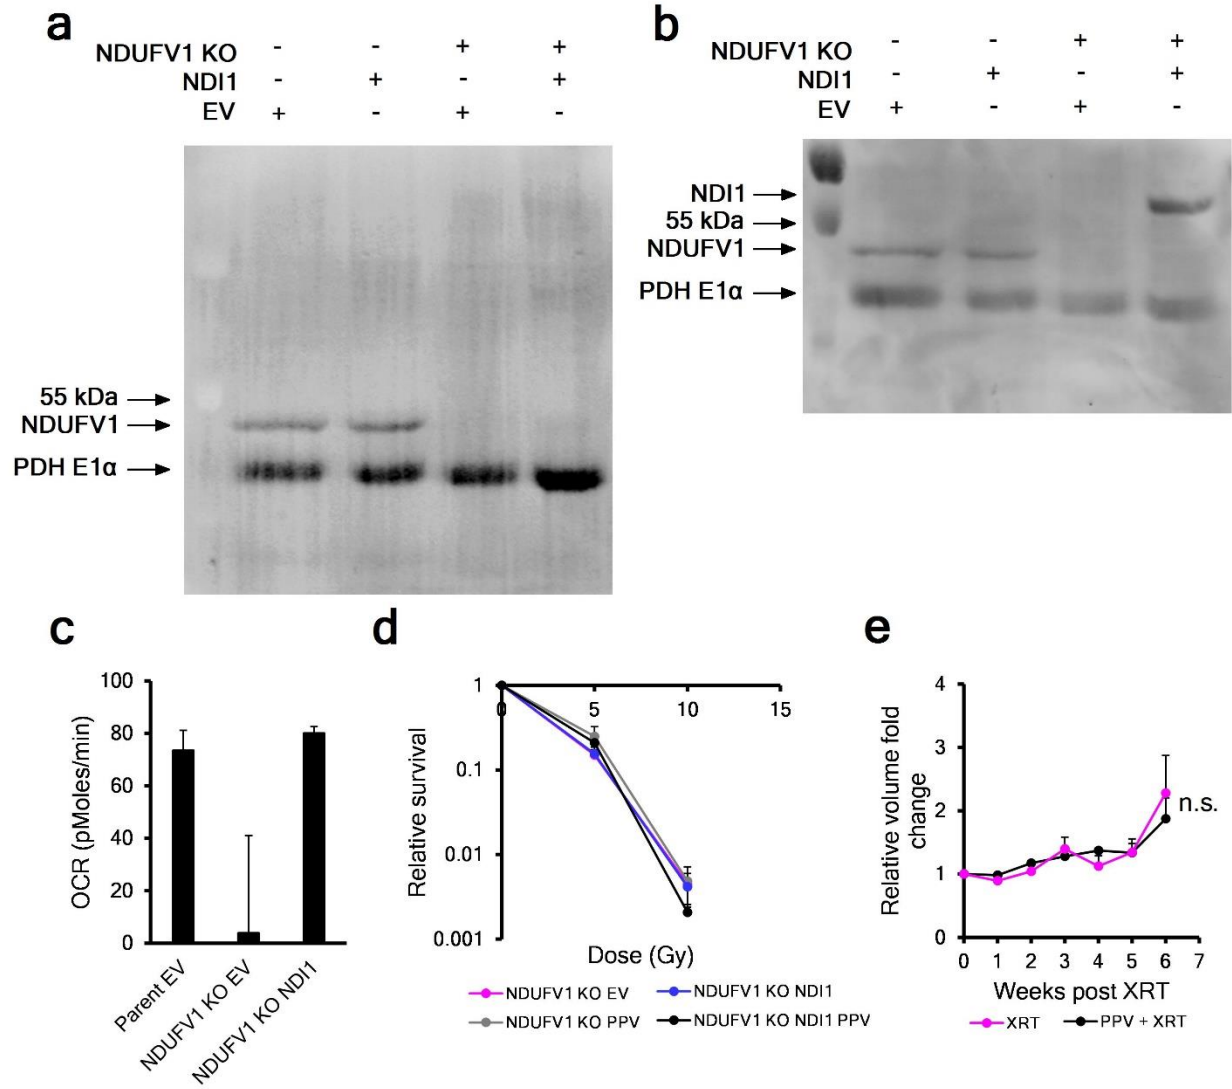

Benej et al Figure S4

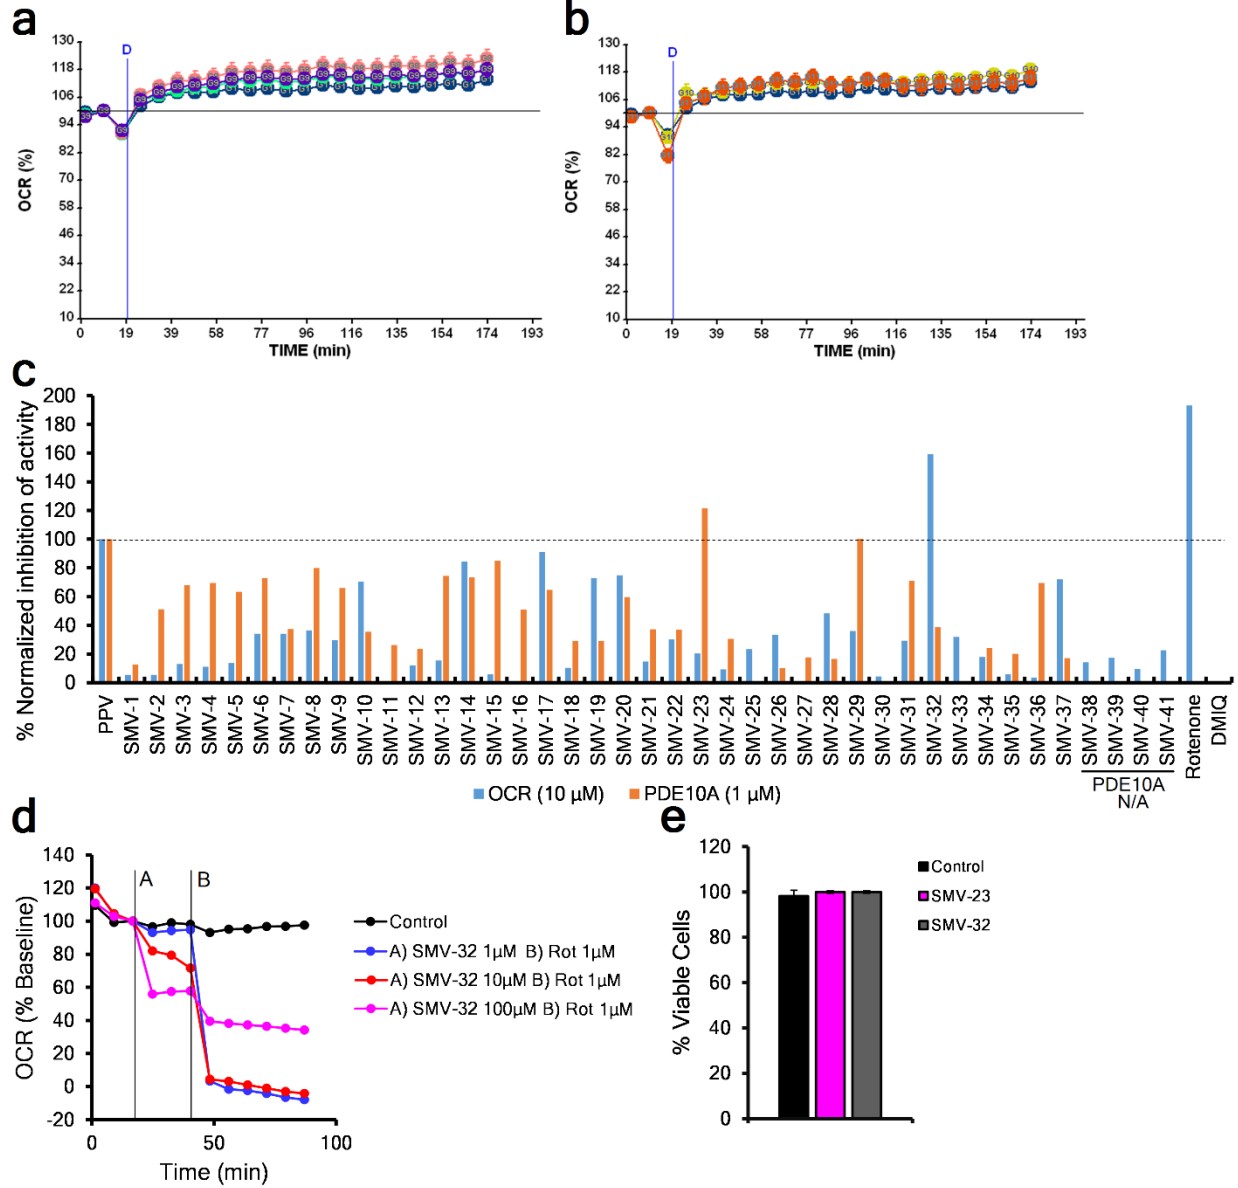

## Benej et al Table S1

List of cell lines with sensitivity to PPV in the low micromolar range

| Cell line         | Origin       | Species |
|-------------------|--------------|---------|
| EO771             | Breast       | Murine  |
| HCT116            | Colon        | Human   |
| RKO               | Colon        | Human   |
| U937              | Leukemia     | Human   |
| MOLM13            | Leukemia     | Human   |
| TIB-190           | Leukemia     | Human   |
| THB-1             | Leukemia     | Human   |
| K-562             | Leukemia     | Human   |
| A549              | Lung         | Human   |
| HCC-827           | Lung         | Human   |
| H460              | Lung         | Human   |
| H23               | Lung         | Human   |
| H441              | Lung         | Human   |
| H727              | Lung         | Human   |
| H1568             | Lung         | Human   |
| Bone marrow naïve | Normal       | Murine  |
| HCF               | Normal       | Human   |
| HEK293T           | Normal       | Human   |
| OSA16             | Osteosarcoma | Canine  |
| OSA18             | Osteosarcoma | Canine  |
| BxPC3             | Pancreas     | Human   |
| Panc1             | Pancreas     | Human   |
| MiaPaca2          | Pancreas     | Human   |
| SU.86             | Pancreas     | Human   |
| PSN-1             | Pancreas     | Human   |
| KPC               | Pancreas     | Murine  |
| FaDu              | Pharynx      | Human   |
| Cal27             | Tongue       | Human   |

Benej et al Table S2

Chemical structures of the papaverine derivatives and their activity.

| Compound No.                                                                                        | MW      | Inhibitory activity |                       |
|-----------------------------------------------------------------------------------------------------|---------|---------------------|-----------------------|
|                                                                                                     | (g/mol) | OCR<br>% of PPV     | PDE10A<br>% of<br>PPV |
| 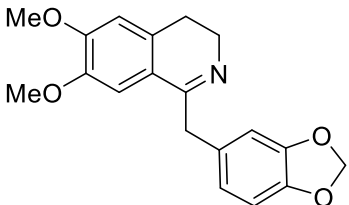<br><b>SMV-1</b>   | 325.36  | 5.55                | 12.77                 |
| <br><b>SMV-2</b>   | 337.33  | 5.55                | 51.12                 |
| <br><b>SMV-3</b>  | 339.35  | 12.96               | 67.90                 |
| <br><b>SMV-4</b> | 323.35  | 11.11               | 69.54                 |
| <br><b>SMV-5</b> | 383.40  | 13.63               | 63.39                 |



|                                                                                                                                      |        |       |       |
|--------------------------------------------------------------------------------------------------------------------------------------|--------|-------|-------|
| 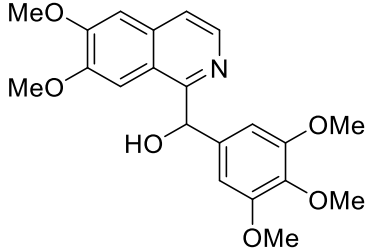 <p style="text-align: center;"><b>SMV-6</b></p>    | 385.42 | 34.09 | 72.86 |
|  <p style="text-align: center;"><b>SMV-7</b></p>    | 369.42 | 34.09 | 37.37 |
|  <p style="text-align: center;"><b>SMV-8</b></p>    | 309.37 | 36.36 | 79.93 |
|  <p style="text-align: center;"><b>SMV-9</b></p>  | 323.35 | 29.55 | 65.88 |
|  <p style="text-align: center;"><b>SMV-10</b></p> | 325.36 | 70.45 | 35.44 |
|  <p style="text-align: center;"><b>SMV-11</b></p> | 293.32 | 0     | 26.28 |

|                                                                                                                                      |        |       |       |
|--------------------------------------------------------------------------------------------------------------------------------------|--------|-------|-------|
| 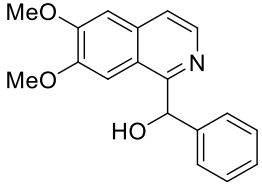 <p style="text-align: center;"><b>SMV-12</b></p>   | 295.34 | 12.07 | 23.60 |
|  <p style="text-align: center;"><b>SMV-13</b></p>   | 391.47 | 15.51 | 74.38 |
|  <p style="text-align: center;"><b>SMV-14</b></p>   | 393.48 | 84.42 | 73.33 |
|  <p style="text-align: center;"><b>SMV-15</b></p>  | 323.39 | 5.86  | 85.02 |
|  <p style="text-align: center;"><b>SMV-16</b></p> | 351.40 | 0     | 50.92 |
|  <p style="text-align: center;"><b>SMV-17</b></p> | 337.42 | 91.18 | 64.65 |
|                                                   | 353.42 | 10.35 | 29.18 |

|                                                                                                      |        |       |        |
|------------------------------------------------------------------------------------------------------|--------|-------|--------|
| <b>SMV-18</b>                                                                                        |        |       |        |
| 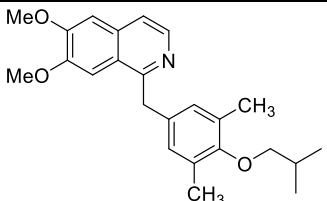<br><b>SMV-19</b>   | 379.50 | 72.88 | 29.13  |
| <br><b>SMV-20</b>   | 377.48 | 74.81 | 59.69  |
| <br><b>SMV-21</b>  | 339.44 | 14.81 | 37.27  |
| <br><b>SMV-22</b> | 309.41 | 30.09 | 40.00  |
| <br><b>SMV-23</b> | 307.39 | 20.37 | 121.49 |
| <br><b>SMV-24</b> | 321.38 | 9.26  | 30.52  |

|                                                                                                          |        |       |       |
|----------------------------------------------------------------------------------------------------------|--------|-------|-------|
| 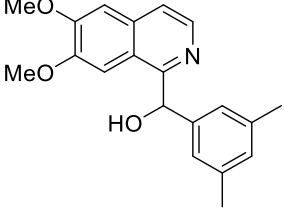 <p><b>SMV-25</b></p>   | 323.39 | 23.40 | 0     |
|  <p><b>SMV-26</b></p>   | 415.34 | 33.4  | 10.28 |
|  <p><b>SMV-27</b></p>   | 429.32 | 0     | 17.69 |
|  <p><b>SMV-28</b></p> | 431.33 | 48.27 | 16.58 |
|  <p><b>SMV-29</b></p> | 329.40 | 35.99 | 100   |
|  <p><b>SMV-30</b></p> | 343.38 | 4.34  | 0     |

|                                                                                                                                      |        |       |       |
|--------------------------------------------------------------------------------------------------------------------------------------|--------|-------|-------|
| 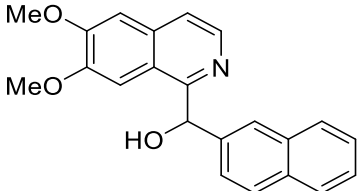 <p style="text-align: center;"><b>SMV-31</b></p>   | 345.40 | 29.26 | 70.84 |
|  <p style="text-align: center;"><b>SMV-32</b></p>   | 329.40 | 159.3 | 38.66 |
|  <p style="text-align: center;"><b>SMV-33</b></p>   | 343.38 | 31.91 | 0     |
|  <p style="text-align: center;"><b>SMV-34</b></p>  | 345.40 | 18    | 24.24 |
|  <p style="text-align: center;"><b>SMV-35</b></p> | 353.42 | 5.94  | 20.16 |
|  <p style="text-align: center;"><b>SMV-36</b></p> | 325.36 | 3.64  | 69.55 |
|  <p style="text-align: center;"><b>SMV-37</b></p> | 355.39 | 72.05 | 17.18 |

|                                                                                                                                        |        |       |     |
|----------------------------------------------------------------------------------------------------------------------------------------|--------|-------|-----|
| 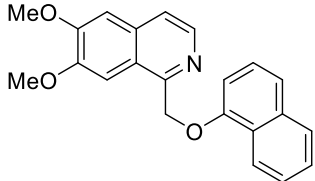 <p style="text-align: center;"><b>SMV-38</b></p>     | 345.40 | 14.19 | N/A |
|  <p style="text-align: center;"><b>SMV-39</b></p>     | 307.49 | 17.43 | N/A |
|  <p style="text-align: center;"><b>SMV-40</b></p>     | 321.38 | 9.64  | N/A |
|  <p style="text-align: center;"><b>SMV-41</b></p>    | 323.39 | 22.69 | N/A |
|  <p style="text-align: center;"><b>Rotenone</b></p> | 394.41 | 193   | 0   |
|  <p>6,7-dimethoxyisoquinoline<br/><b>DMIQ</b></p>   | 189.21 | 0     | 0   |
